# Supplementary figures and images for: The Role of Glycerol in Modulating Ionic Transport and Electrochemical Performance of PEO:NaCl Solid Polymer Electrolytes
Source: Research Square preprint supplement (doi:10.21203/rs.3.rs-5763604/v1), 2025-01-08

**Graphical Abstract**


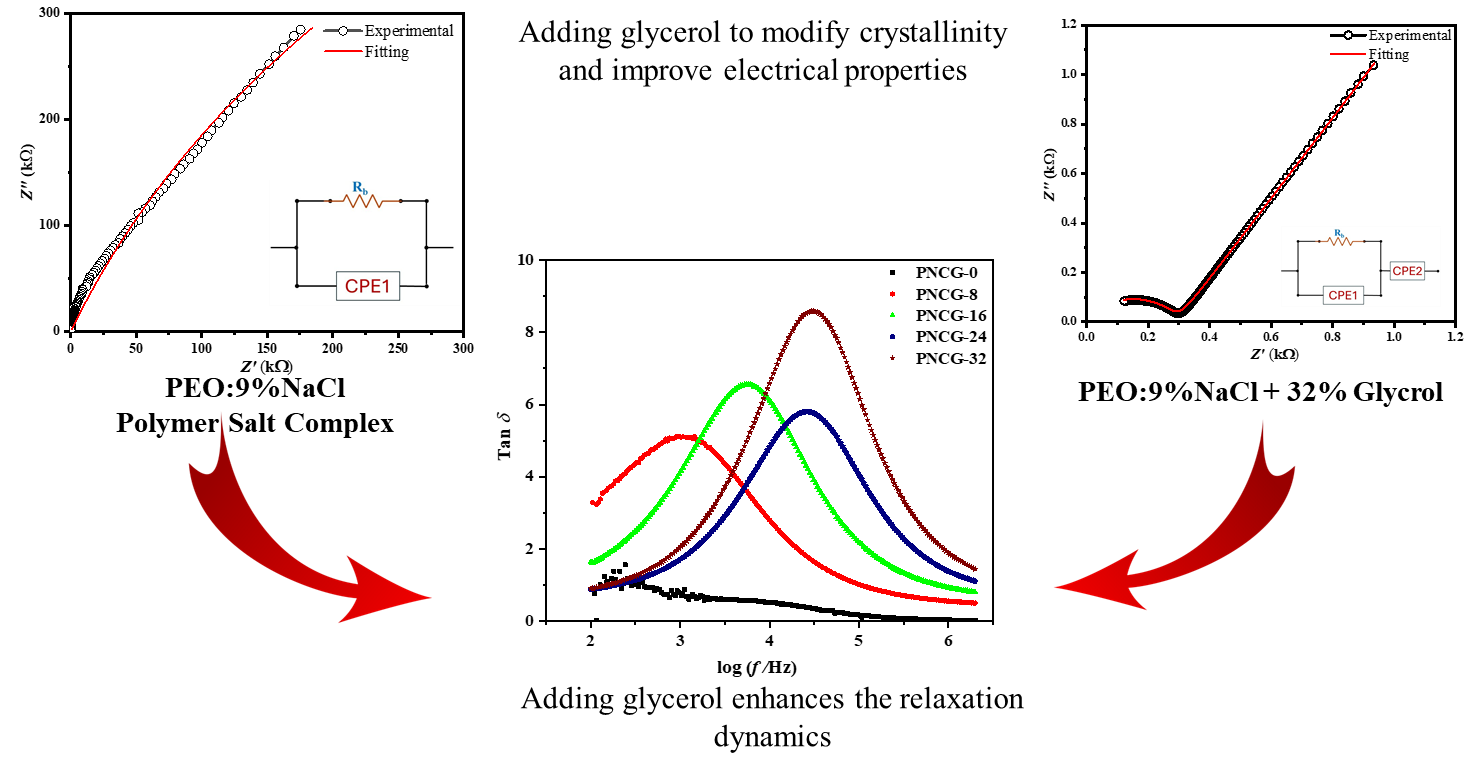

Supplement: Supplementary file 1 [file 8db640a6df163b5eeb3becc8.docx]
